# Supplementary material for: Nickel selenide from single-molecule electrodeposition for efficient electrocatalytic overall water splitting
Source: Royal Society of Chemistry journal article supplement (doi:10.1039/d0nj04966b), 2020-11-17
Supplement: d0nj04966b1.pdf [file d0nj04966b1.pdf]

1

*Electronic Supplementary Information*

2 **Nickel selenide from single molecule electrodeposition**  
3 **for efficient electrocatalytic overall water splitting**

4

5 Dandan Chen,<sup>a</sup> Yingdong Chen,<sup>a</sup> Wei Zhang,<sup>a,\*</sup> Rui Cao<sup>a,\*</sup>

6 <sup>a</sup>*Key Laboratory of Applied Surface and Colloid Chemistry, Ministry of Education and School of Chemistry and*

7 *Chemical Engineering, Shaanxi Normal University, Xi'an 710119, China*

8 \*Correspondence E-mail: [zw@snnu.edu.cn](mailto:zw@snnu.edu.cn); [ruicao@ruc.edu.cn](mailto:ruicao@ruc.edu.cn)

9

1  
2  
3  
4  
5  
6

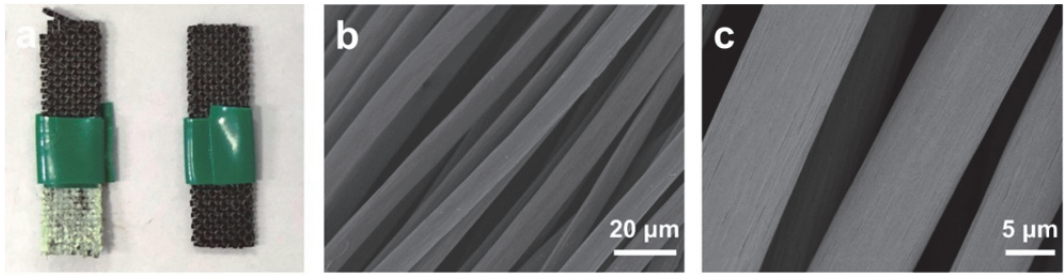

7 **Figure S1.** (a) Photographs of blank CC substrate (right) and NiSe-TMEDA/CC  
8 (left). (b, c) SEM images of blank carbon cloth.

1  
2  
3  
4  
5  
6  
7  
8  
9  
10  
11  
12  
13

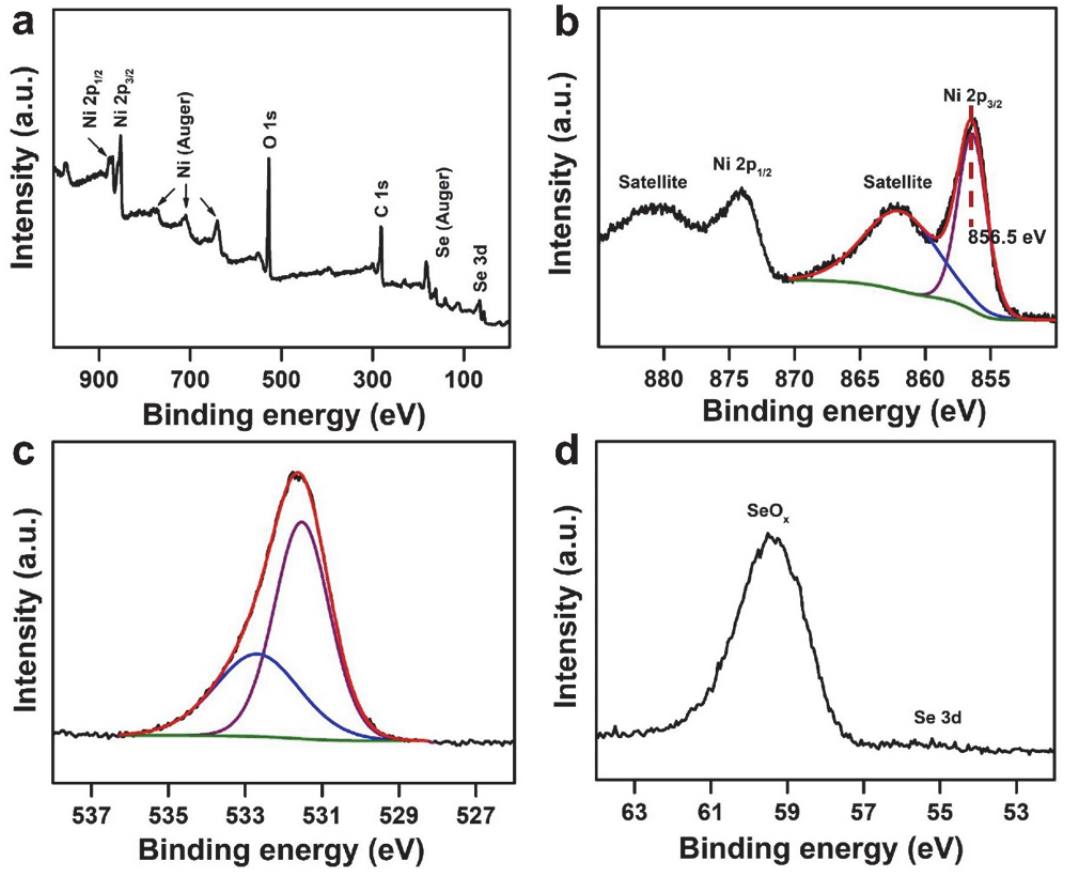

14 **Figure S2.** (a) XPS survey scan spectrum of NiSe-TMEDA/CC. High-resolution XPS  
15 spectra in the (b) Ni 2p, (c) O 1s and (d) Se 3d regions for NiSe-TMEDA/CC.

1  
2  
3  
4  
5  
6  
7  
8  
9  
10  
11  
12  
13  
14  
15

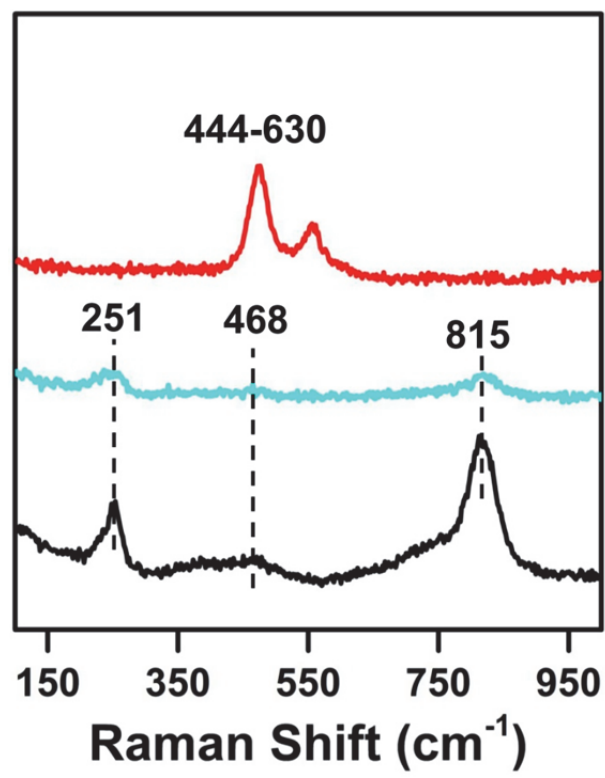

**Figure S3.** Raman spectra of the NiSe-TMEDA/CC electrode surface before (black lines) and after HER (blue line) or OER (red lines) electrolysis.

1  
2  
3  
4  
5  
6  
7  
8  
9  
10  
11  
12  
13  
14  
15  
16  
17

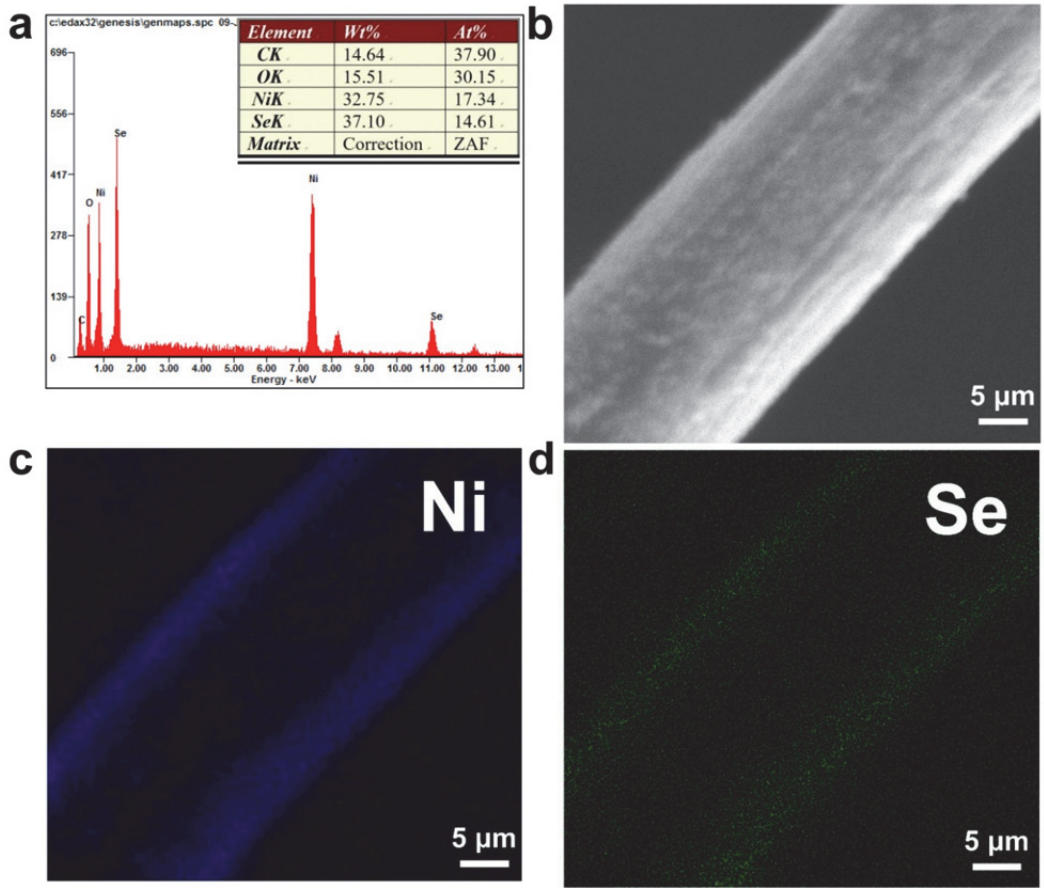

**Figure S4.** (a) EDX spectrum of the NiSe-TMEDA/CC. (b) SEM image of NiSe-TMEDA/CC and the corresponding element mapping images of Ni (c) and Se (d).

1  
2  
3  
4  
5  
6  
7  
8  
9  
10  
11  
12  
13

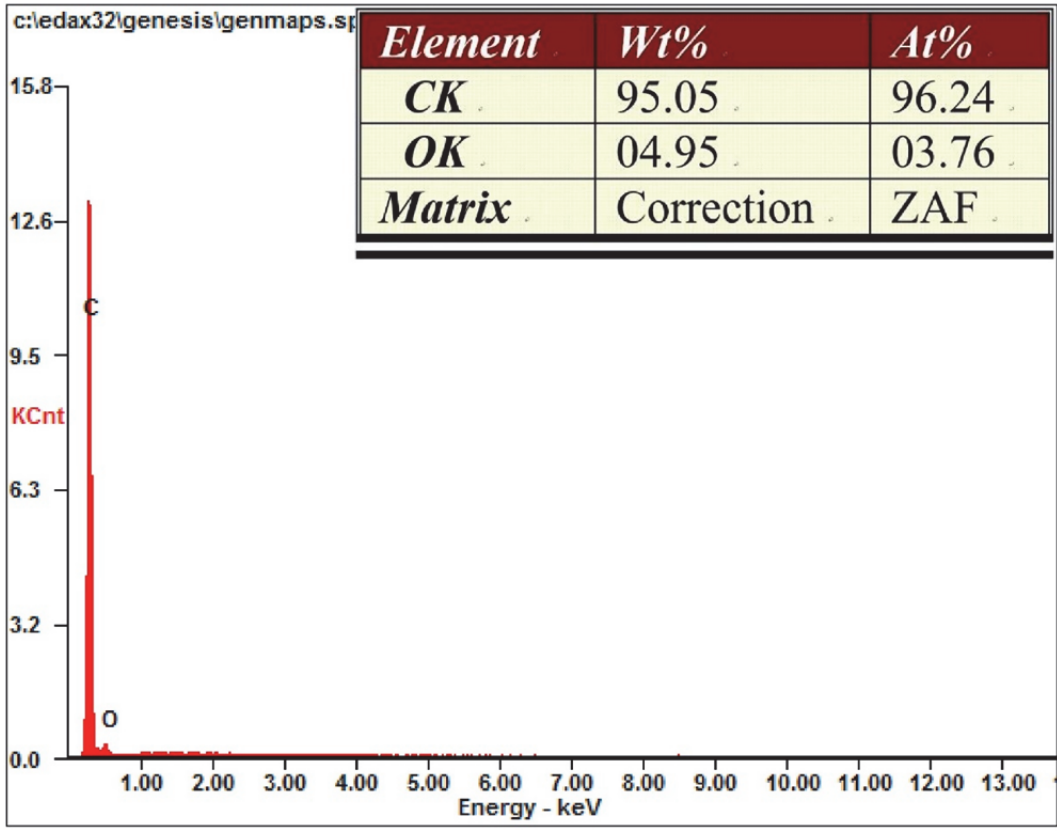

14 **Figure S5.** EDX spectrum of the blank CC.

1  
2  
3  
4  
5  
6  
7  
8  
9  
10  
11  
12  
13  
14  
15  
16

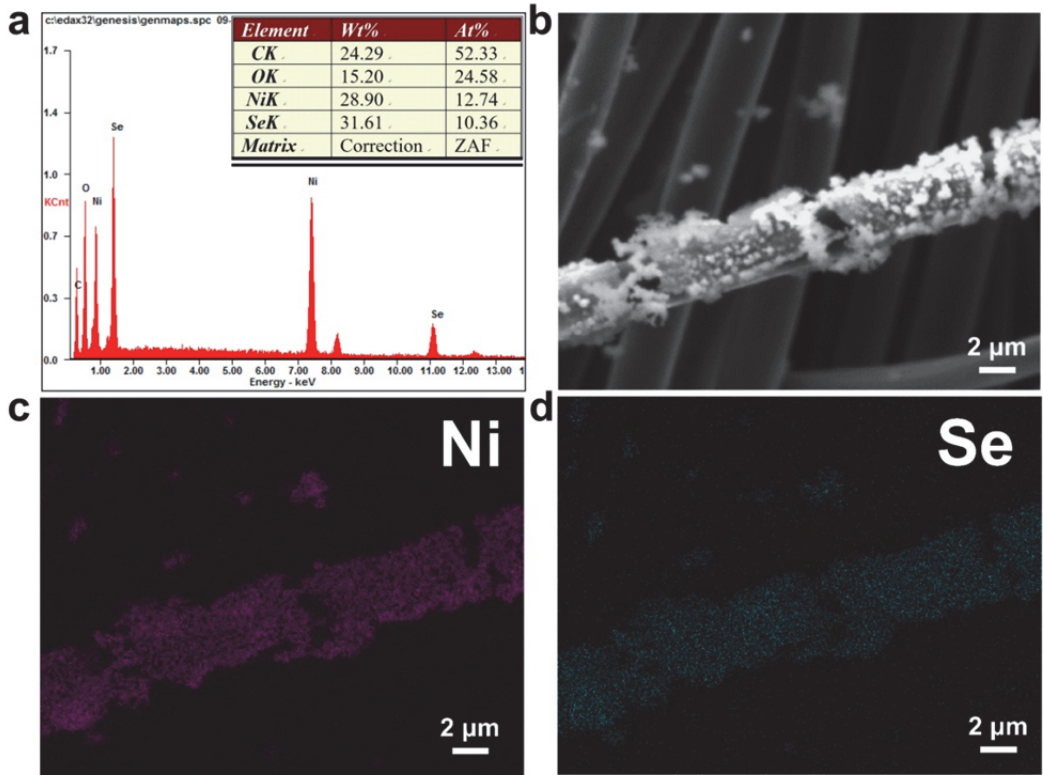

**Figure S6.** (a) EDX spectrum of NiSe/CC. (b) SEM image of the NiSe/CC electrode and the corresponding element mapping images of Ni (c) and Se (d).

1  
2  
3  
4  
5  
6  
7  
8  
9  
10  
11  
12  
13  
14

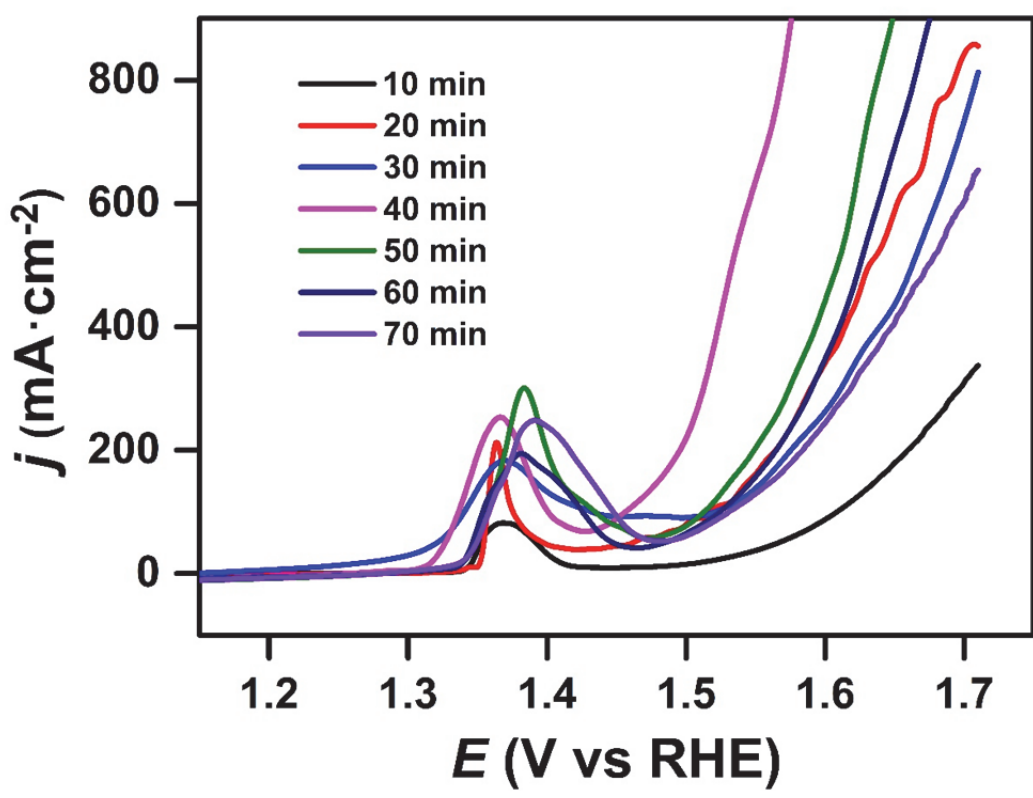

**Figure S7.** The OER performance of electrodes with different mass loading by adjusting the electrodeposition time during the preparation of the electrodes.



1  
2  
3  
4  
5  
6  
7  
8  
9  
10  
11  
12

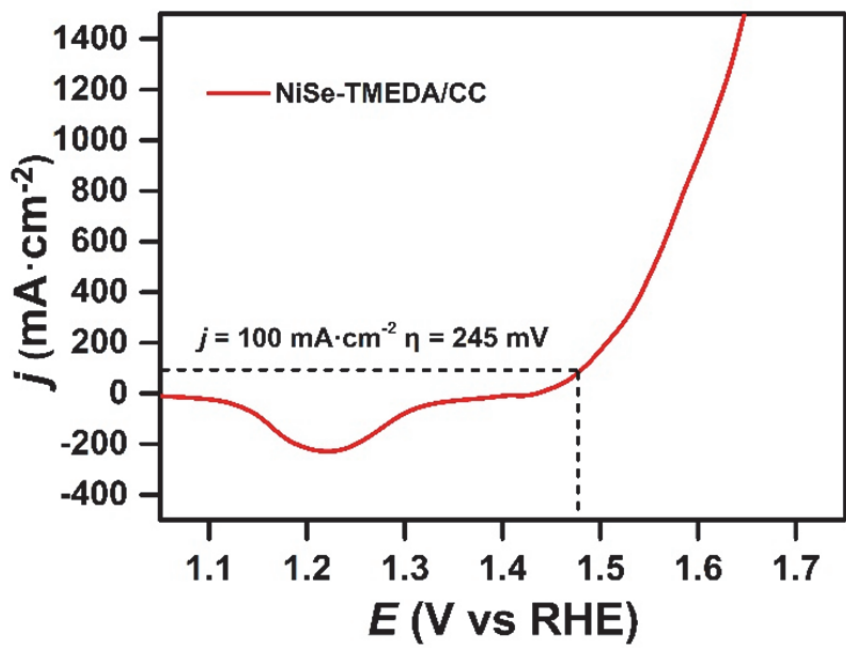

**Figure S8.** The cathodic sweep curve of OER from the NiSe-TMEDA/CC electrode.

1  
2  
3  
4  
5  
6  
7  
8  
9  
10

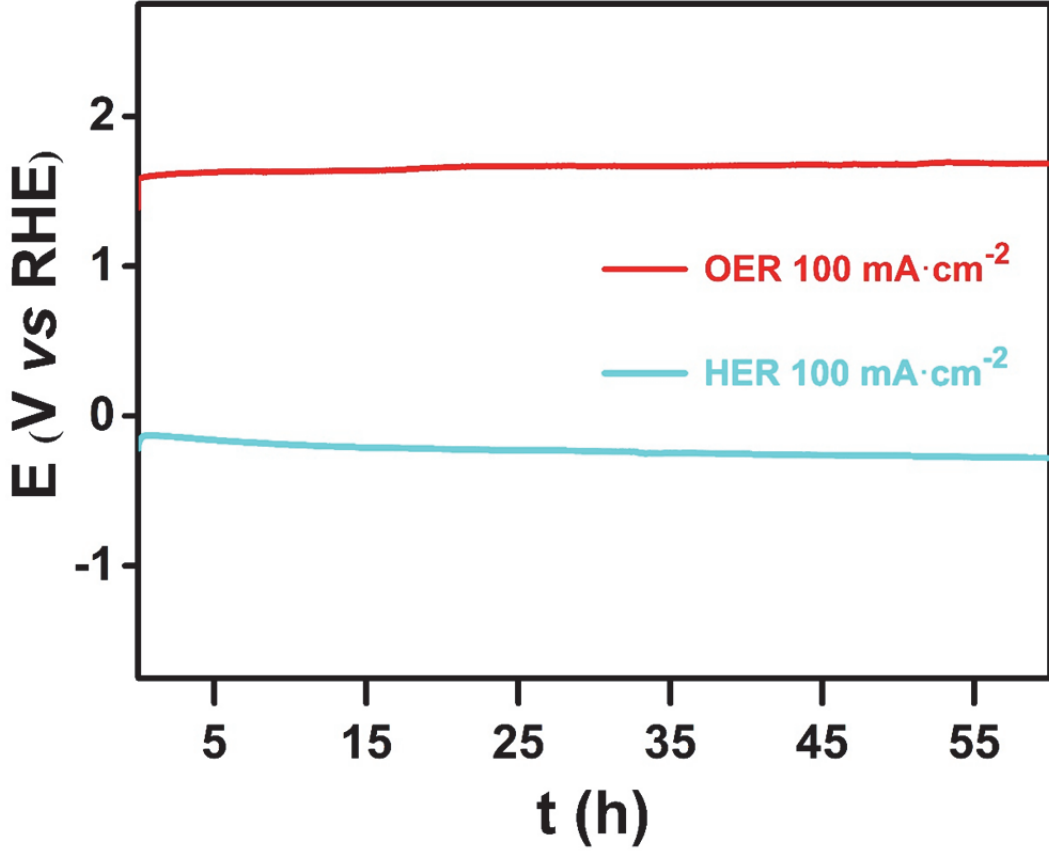

11 **Figure S9.** The Chronopotentiometry of the NiSe-TMEDA/CC electrode at 100 mA  
12  $\text{cm}^{-2}$  for both OER and HER without  $iR$  compensation.

1  
2  
3  
4  
5  
6  
7  
8  
9  
10  
11  
12  
13  
14  
15  
16  
17  
18

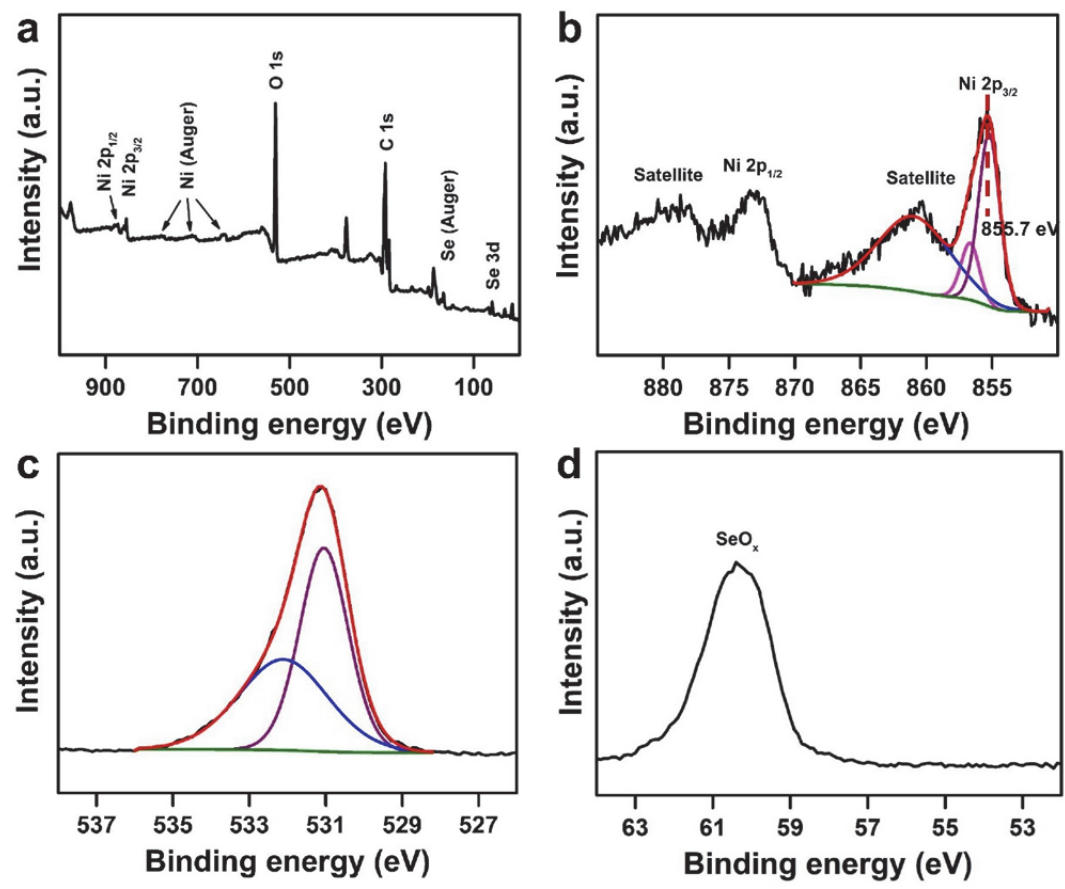

**Figure S10.** (a) XPS survey scan spectrum of the post-OER NiSe-TMEDA/CC electrode. High-resolution XPS spectra in the (b) Ni 2p, (c) O 1s and (d) Se 3d regions for the post-OER NiSe-TMEDA/CC.

1  
2  
3  
4  
5  
6  
7  
8  
9  
10  
11  
12  
13  
14  
15  
16  
17  
18

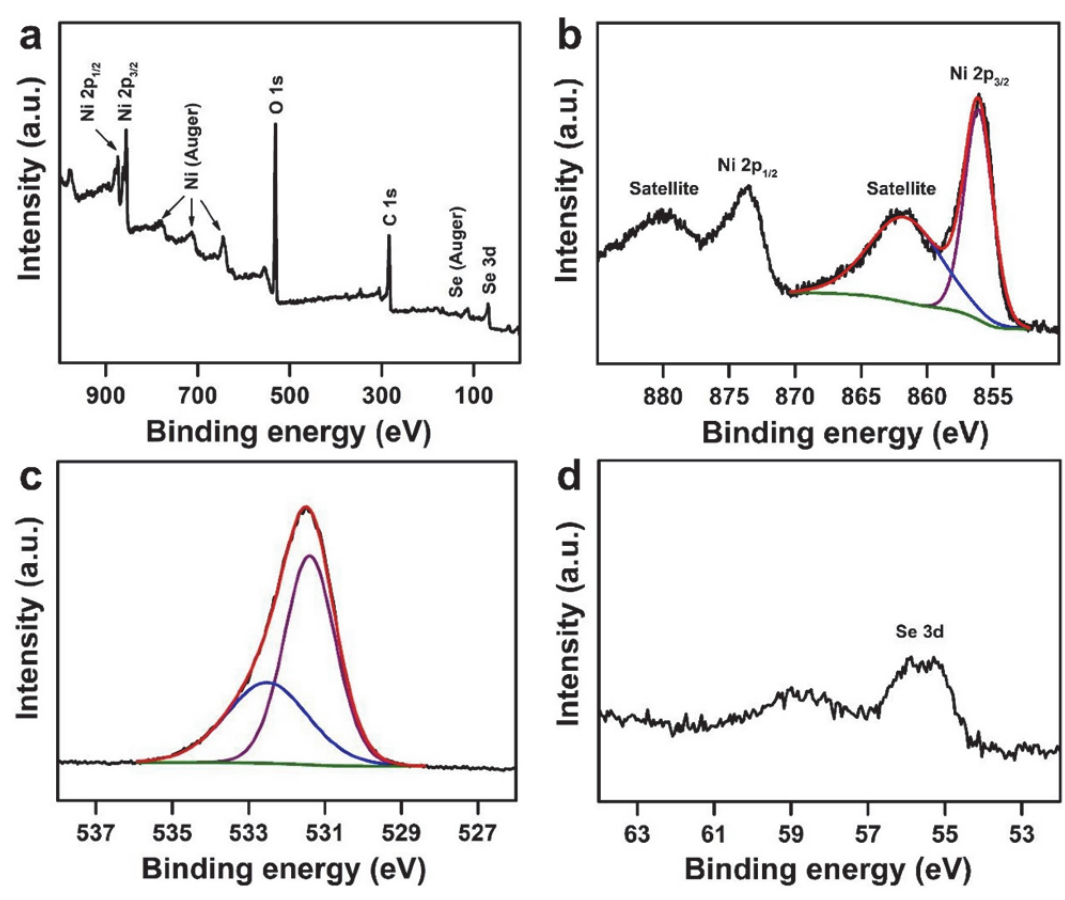

**Figure S11.** (a) XPS survey scan spectrum of the post-HER NiSe-TMEDA/CC electrode. High-resolution XPS spectra in the (b) Ni 2p, (c) O 1s and (d) Se 3d regions for the post-HER NiSe-TMEDA/CC.

1  
2  
3  
4  
5  
6  
7  
8  
9  
10  
11  
12  
13  
14  
15  
16  
17

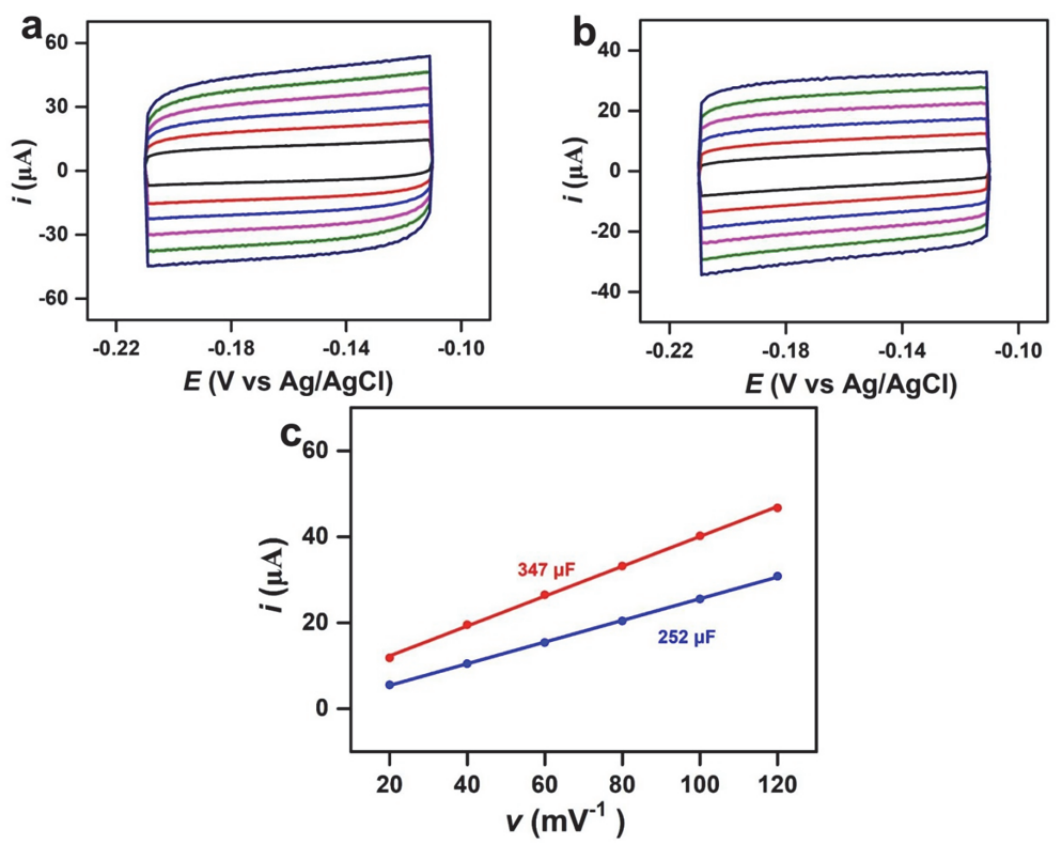

**Figure S12.** Charging currents of (a) the NiSe-TMEDA/CC and (b) NiSe/CC electrodes recorded in the non-Faradaic potential region at different scan rates from 20 to 120  $\text{mV s}^{-1}$ . (c) The anodic charging currents at -0.16 V plotted against the scan rates for the NiSe-TMEDA/CC (red line) and NiSe/CC (blue line).

1  
2  
3  
4  
5  
6  
7  
8  
9  
10

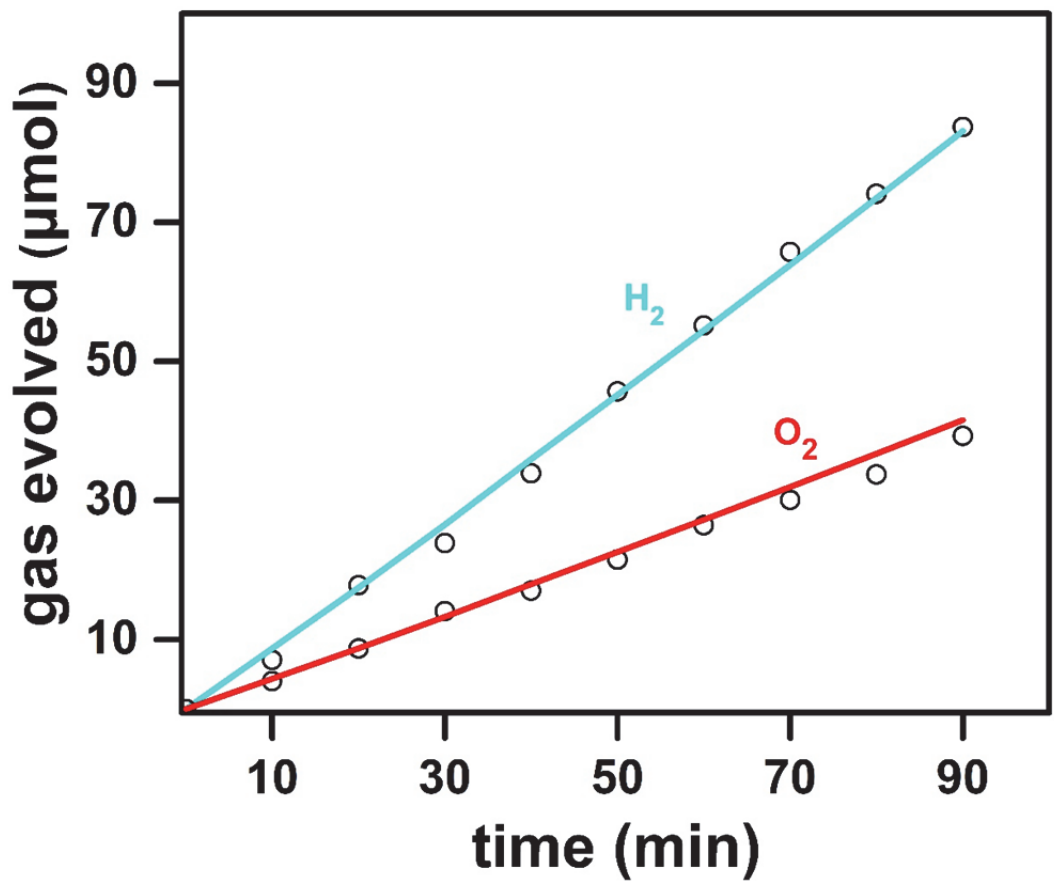

11 **Figure S13.** The experimental (open dots) and theoretical (solid lines) amounts of  
12 evolved gasses during HER and OER.

1 **Table S1.** Comparison of the overall water splitting performance of the as-prepared  
 2 NiSe-TMEDA/CC electrode with literature reports of bifunctional water splitting  
 3 electrodes.

| Electrodes                                               | Electro-lyte   | Water electrolsis                    | Ref.                                                      |
|----------------------------------------------------------|----------------|--------------------------------------|-----------------------------------------------------------|
| <b>NiSe-TMEDA/CC</b>                                     | <b>1 M KOH</b> | <b>1.52 V@100 mA cm<sup>-2</sup></b> | <b>This work</b>                                          |
| NiSe-Ni <sub>0.85</sub> Se/CP                            | 1 M KOH        | 1.89 V@100 mA cm <sup>-2</sup>       | <i>Small</i> , <b>2018</b> , <i>14</i> , 1800763          |
| NiSe <sub>2</sub> /CFP                                   | 1 M KOH        | 1.66 V@10 mA cm <sup>-2</sup>        | <i>Electrochim. Acta</i> , <b>2019</b> , 305 37           |
| NiSe <sub>2</sub> /CC                                    | 1 M KOH        | 1.62 V@10 mA cm <sup>-2</sup>        | <i>Electrochim. Acta</i> , <b>2018</b> , 279 195          |
| NiSe <sub>2</sub> nanowires                              | 1 M KOH        | 1.55 V@10 mA cm <sup>-2</sup>        | <i>Small</i> , <b>2017</b> , <i>13</i> , 1701487          |
| Se-MnS/NiS                                               | 1 M KOH        | 1.47 V@10 mA cm <sup>-2</sup>        | <i>J. Mater. Chem. A</i> , <b>2019</b> , <i>7</i> , 26975 |
| Ni <sub>3</sub> Se <sub>2</sub> /NiSe                    | 1 M KOH        | 1.61 V@10 mA cm <sup>-2</sup>        | <i>ChemSusChem</i> , <b>2019</b> , <i>12</i> , 2008       |
| NiSe/Ni/NC                                               | 1 M KOH        | 1.60 V@10 mA cm <sup>-2</sup>        | <i>Electrochim. Acta</i> , <b>2019</b> , 300, 93          |
| Fe <sub>0.09</sub> Co <sub>0.13</sub> -NiSe <sub>2</sub> | 1 M KOH        | 1.52 V@10 mA cm <sup>-2</sup>        | <i>Adv. Mater.</i> , <b>2018</b> , <i>30</i> , 1802121    |
| NiFeMo/NF                                                | 1 M KOH        | 1.45 V@10 mA cm <sup>-2</sup>        | <i>ACS Energy Lett.</i> , <b>2018</b> , <i>3</i> , 546    |
| Ni-Fe NP                                                 | 1 M KOH        | 1.47 V@10 mA cm <sup>-2</sup>        | <i>Nature Commun.</i> , <b>2019</b> , <i>10</i> , 5599    |
| CoFeZr oxides/NF                                         | 1 M KOH        | 1.63 V@10 mA cm <sup>-2</sup>        | <i>Adv. Mater.</i> , <b>2019</b> , <i>31</i> , 1901439    |

4 CC: carbon cloth; CP: carbon paper; CFP: carbon fiber paper; NF: nickel foam.
